# Supplementary material for: Identification of long non-coding RNAs in two anthozoan species and their possible implications for coral bleaching
Source: PubMed Central journal article supplement (PMC5509713; doi:10.1038/s41598-017-02561-y), 2017-07-13
Supplement: 41598_2017_2561_MOESM1_ESM.pdf [file 41598_2017_2561_MOESM1_ESM.pdf]

# Supplementary Information

## Identification of long non-coding RNAs in two anthozoan species and their possible implication for coral bleaching

Chen Huang<sup>1</sup>, Jean-Étienne RL Morlighem<sup>2,3</sup>, Simon Ming Yuen Lee<sup>1\*</sup>, Qiwen Liao<sup>1</sup>, Carlos Daniel Perez<sup>4</sup>, Paula Braga Gomes<sup>5</sup>, Min Guo<sup>1</sup>, Gandhi R ádis-Baptista<sup>2\*</sup>, Cheuk-Wing Li<sup>1\*</sup>

<sup>1</sup>State Key Laboratory of Quality Research in Chinese Medicine and Institute of Chinese Medical Sciences, University of Macau, Macau, China.

<sup>2</sup>Northeast Biotechnology Network (RENORBIO), Post-graduation program in Biotechnology, Federal University of Cear á Brazil.

<sup>3</sup>Laboratory of Biochemistry and Biotechnology, Institute for Marine Sciences, Federal University of Cear á Brazil.

<sup>4</sup>Centro Acad êmico de Vitoria, Universidade Federal de Pernambuco, Vitória de Santo Ant ão, Brazil

<sup>5</sup>Departamento de Biologia, Universidade Federal Rural de Pernambuco, Recife, Brazil

Authors for correspondence:

Cheuk-Wing Li,

State Key Laboratory of Quality Research in Chinese Medicine, Institute of Chinese Medical Sciences, University of Macau, Macau, China.

E-mail: cheukwli@umac.mo

Simon Ming Yuen Lee,

State Key Laboratory of Quality Research in Chinese Medicine, Institute of Chinese Medical Sciences, University of Macau, Macau, China.

E-mail: simonlee@umac.mo

Gandhi R ádis-Baptista,

Laboratory of Biochemistry and Biotechnology, Institute for Marine Sciences, Federal University of Cear á Av. da Aboli ção, 3207, 60165-081 Fortaleza, CE, Brazil.

E-mail: gandhi.radis@ufc.br

# Supplementary Figures

**Figure S1. Sequencing quality report of RNA-seq of *P.variabilis* by FastQC.** **A)** Kmer content of raw reads from fq1 file of *P.variabilis*. **B)** Per base sequence quality of raw reads from fq1 file of *P.variabilis*. **C)** Per base sequence content of raw reads from fq1 file of *P.variabilis*. **D)** Kmer content of raw reads from fq2 file of *P.variabilis*. **E)** Per base sequence quality of raw reads from fq2 file of *P.variabilis*. **F)** Per base sequence content of raw reads from fq2 file of *P.variabilis*. **G)** Kmer content of clean reads from fq1 file of *P.variabilis*. **H)** Per base sequence quality of clean reads from fq1 file of *P.variabilis*. **I)** Per base sequence content of clean reads from fq1 file of *P.variabilis*. **J)** Kmer content of clean reads from fq2 file of *P.variabilis*. **K)** Per base sequence quality of clean reads from fq2 file of *P.variabilis*. **L)** Per base sequence content of clean reads from fq2 file of *P.variabilis*.

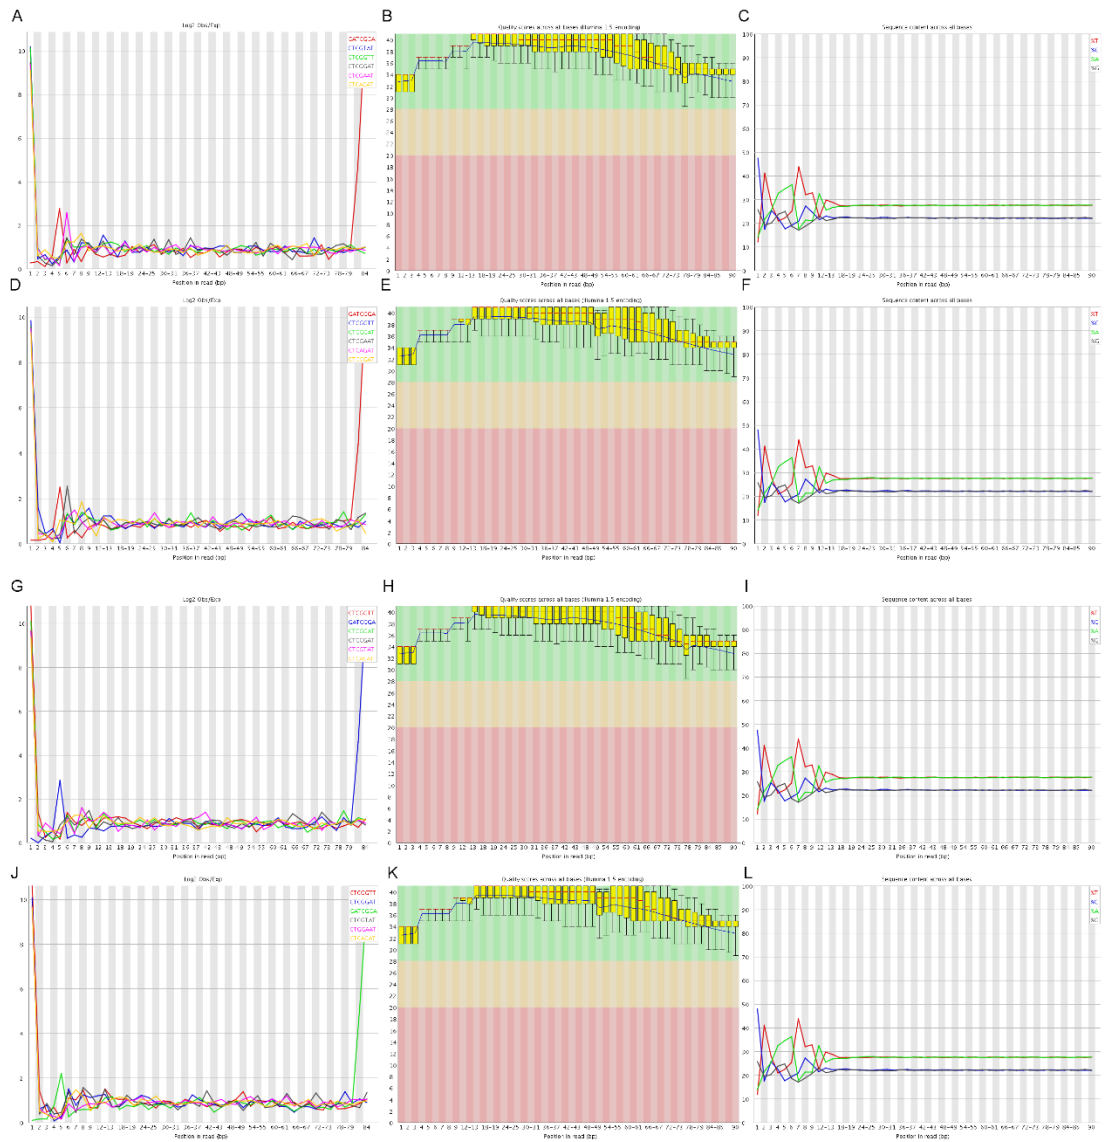

**Figure S2. Sequencing quality report of RNA-seq of healthy *P. caribaeorum* by FastQC. A)** Kmer content of raw reads from fq1 file of healthy *P. caribaeorum*. **B)** Per base sequence quality of raw reads from fq1 file of healthy *P. caribaeorum*. **C)** Per base sequence content of raw reads from fq1 file of healthy *P. caribaeorum*. **D)** Kmer content of raw reads from fq2 file of healthy *P. caribaeorum*. **E)** Per base sequence quality of raw reads from fq2 file of healthy *P. caribaeorum*. **F)** Per base sequence content of raw reads from fq2 file of healthy *P. caribaeorum*. **G)** Kmer content of clean reads from fq1 file of healthy *P. caribaeorum*. **H)** Per base sequence quality of clean reads from fq1 file of healthy *P. caribaeorum*. **I)** Per base sequence content of clean reads from fq1 file of healthy *P. caribaeorum*. **J)** Kmer content of clean reads from fq2 file of healthy *P. caribaeorum*. **K)** Per base sequence quality of clean reads from fq2 file of healthy *P. caribaeorum*. **L)** Per base sequence content of clean reads from fq2 file of healthy *P. caribaeorum*.

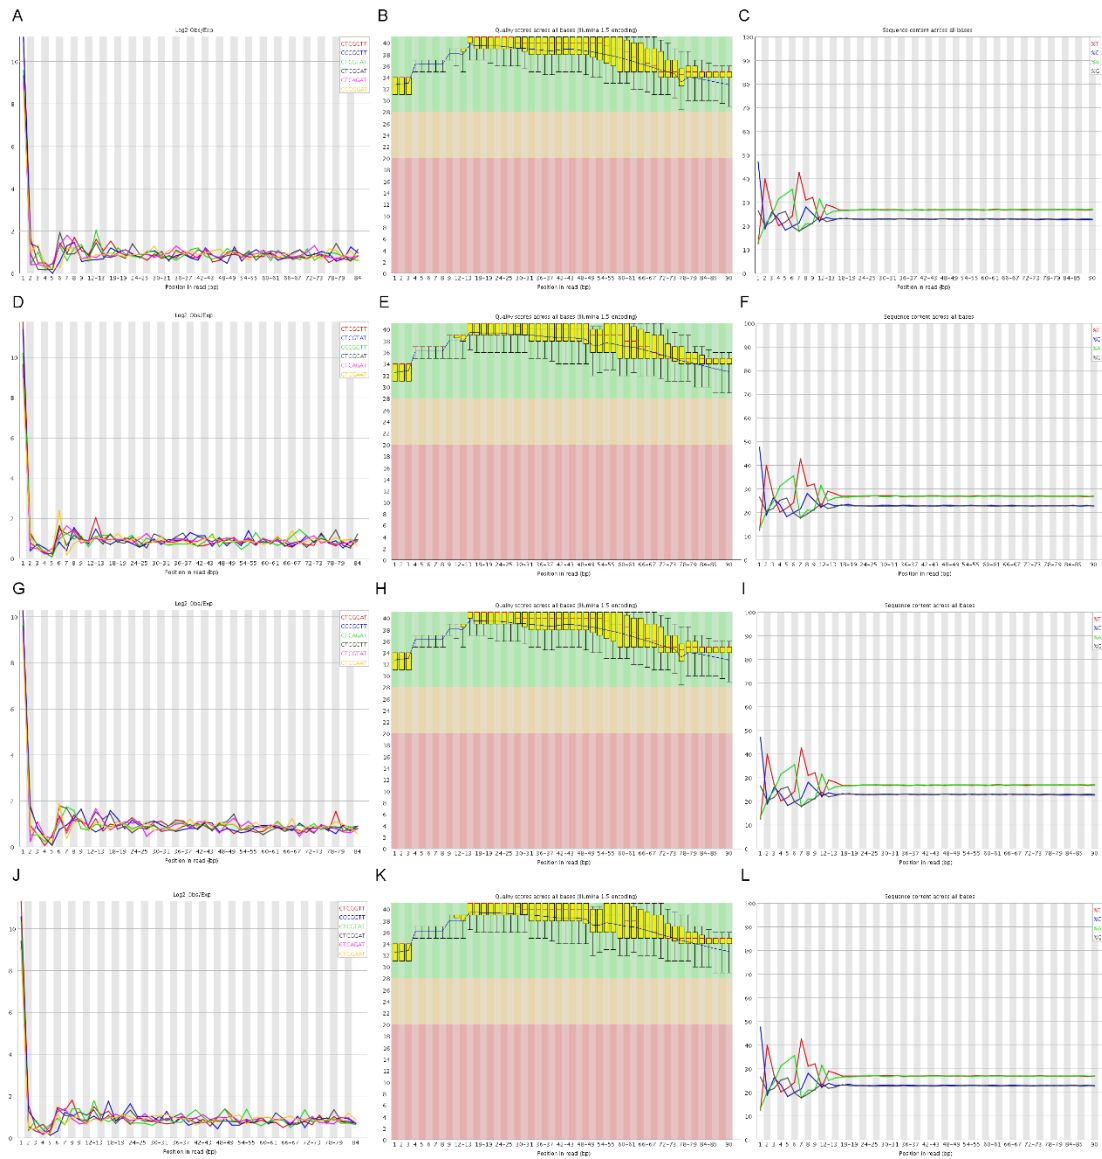

**Figure S3. Sequencing quality report of RNA-seq of *P. caribaeorum* undergoing bleaching by FastQC.** **A)** Kmer content of raw reads from fq1 file of *P. caribaeorum* undergoing bleaching. **B)** Per base sequence quality of raw reads from fq1 file of *P. caribaeorum* undergoing bleaching. **C)** Per base sequence content of raw reads from fq1 file of *P. caribaeorum* undergoing bleaching. **D)** Kmer content of raw reads from fq2 file of *P. caribaeorum* undergoing bleaching. **E)** Per base sequence quality of raw reads from fq2 file of *P. caribaeorum* undergoing bleaching. **F)** Per base sequence content of raw reads from fq2 file of *P. caribaeorum* undergoing bleaching. **G)** Kmer content of clean reads from fq1 file of *P. caribaeorum* undergoing bleaching. **H)** Per base sequence quality of clean reads from fq1 file of *P. caribaeorum* undergoing bleaching. **I)** Per base sequence content of clean reads from fq1 file of *P. caribaeorum* undergoing bleaching. **J)** Kmer content of clean reads from fq2 file of *P. caribaeorum* undergoing bleaching. **K)** Per base sequence quality of clean reads from fq2 file of *P. caribaeorum* undergoing bleaching. **L)** Per base sequence content of clean reads from fq2 file of *P. caribaeorum* undergoing bleaching.

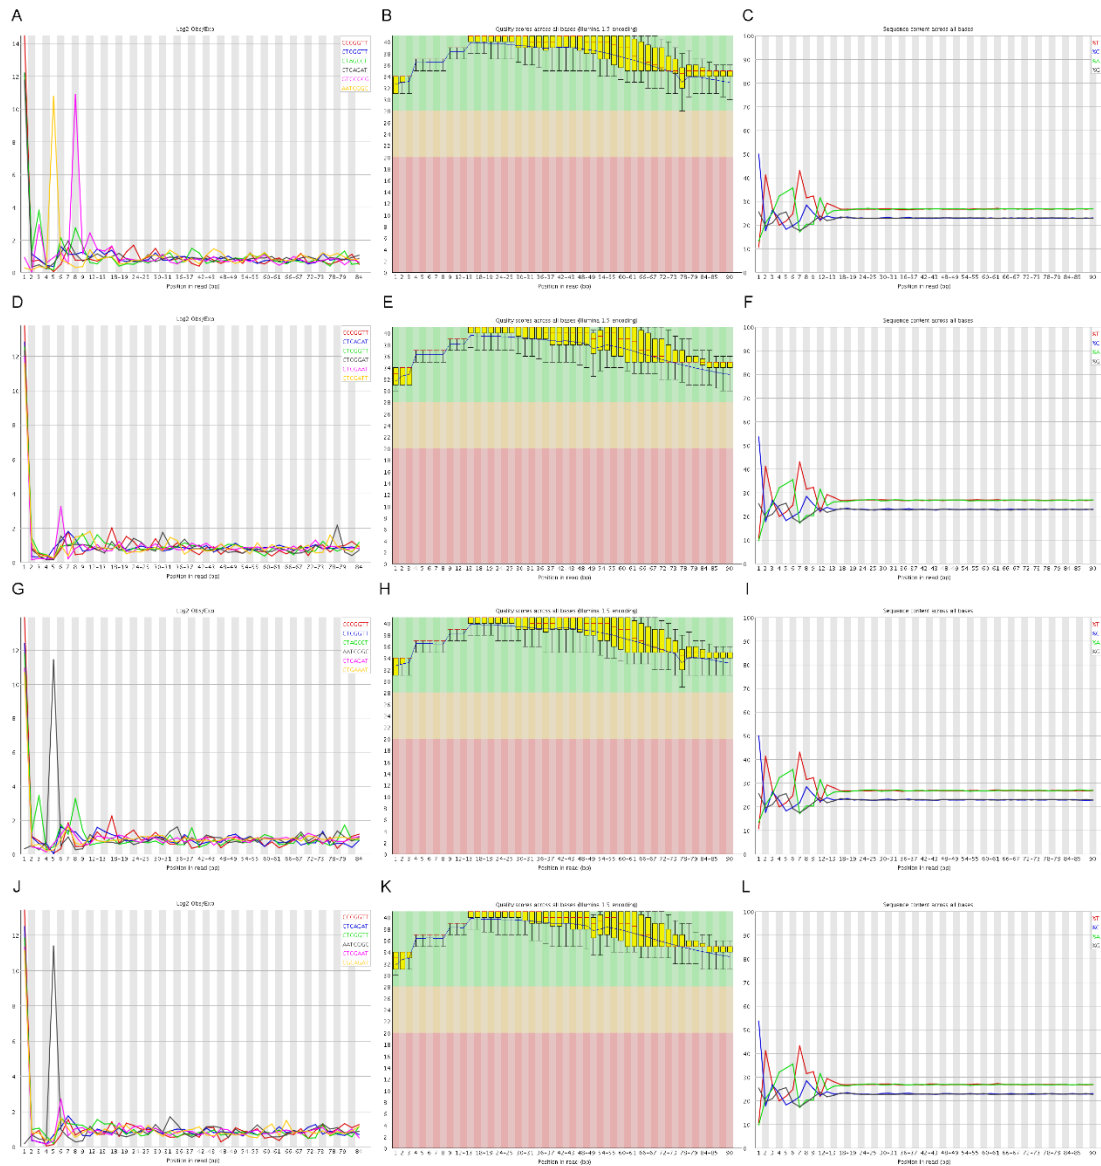

**Figure S4. Species Distribution of putative lncRNAs in *P. variabilis* and *P. caribaeorum* determined by the best sequence hits.** The lncRNA-like sequences of *P. variabilis* and *P. caribaeorum* were annotated by comparing with the lncRNA sequences in NONCODE v3.0 database using BLASTN, respectively (E-value $\leq$ 1.0E-3). Part A –*P. caribaeorum*. Part-B –*P. variabilis*.

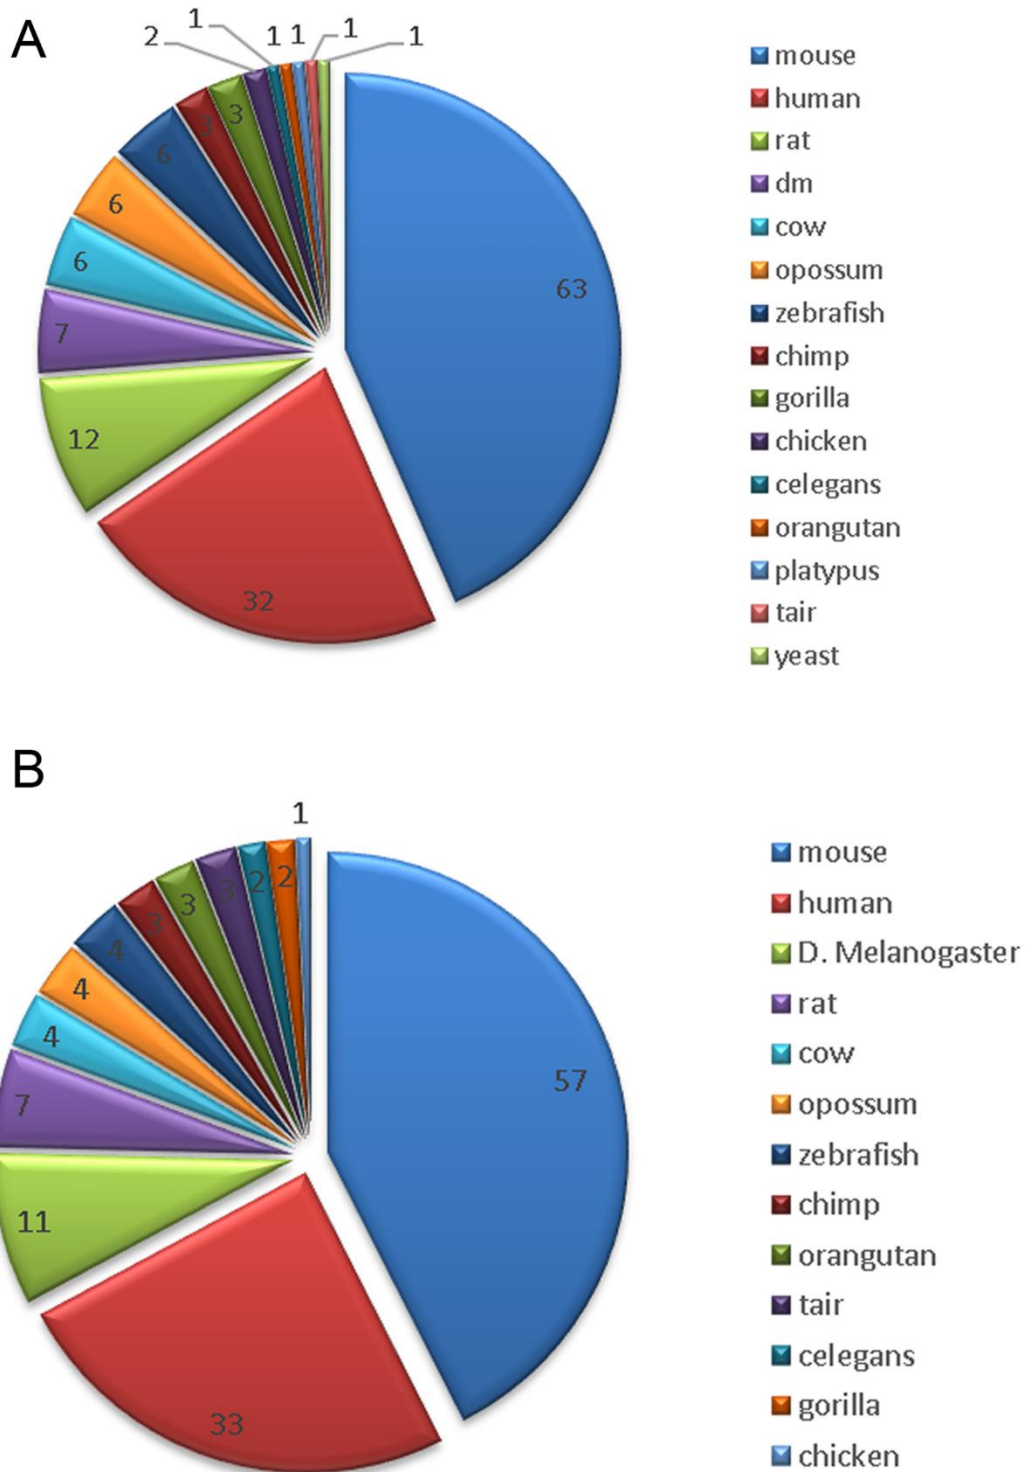

**Figure S5 Comparison of *P. caribaeorum* lncRNA (CL4490.Contig2) to the lncRNAs derived from diverse model species. A)** Sketch map of localization of conserved regions of *P. caribaeorum* lncRNA (CL4490.Contig2) in the lncRNAs (NONDREG203605, NONHSAG287712, NONPTRG204298, and NONMMUG317856 in NONCODE v3.0 database) of diverse model species: *Palythoa*, *Zebrafish*, *Human*, *Chimpanzee* and *Mouse*. **B)** Multiple alignment of the region of conservation of the *P. caribaeorum* lncRNA with compared lncRNAs in *Zebrafish*, *Human*, *Chimpanzee* and *Mouse*.

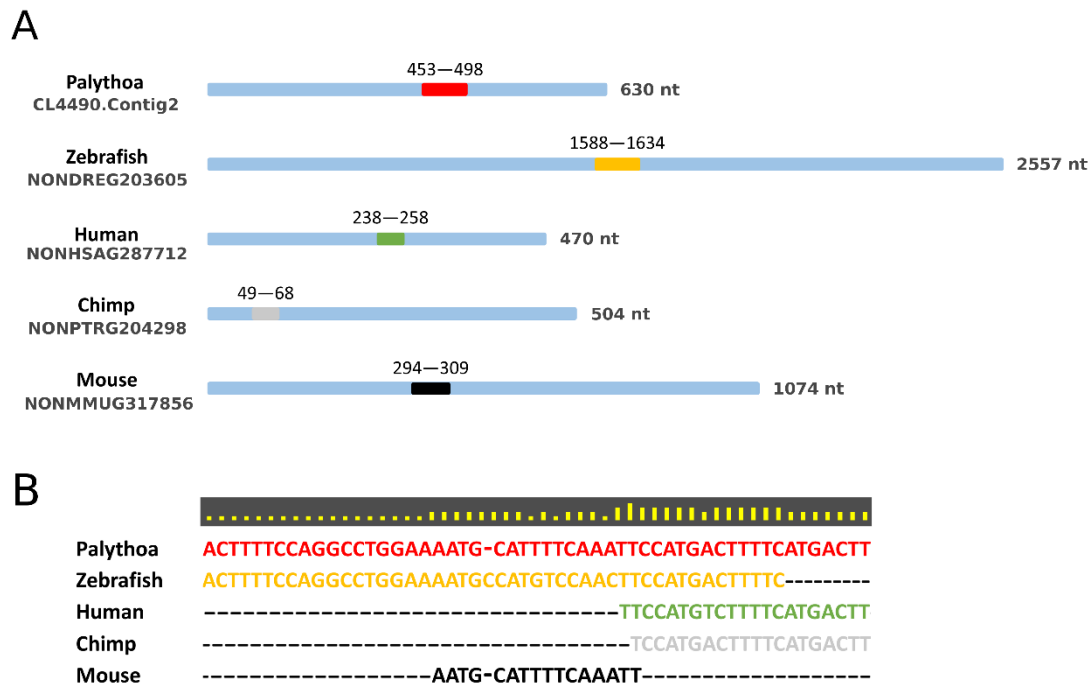

**Figure S6 Interaction pattern of lncRNA with target mRNA based on conserved region proposed in *P. caribaeorum*. A)** The secondary structures of Human lncRNA (NONHSAG31852, NONCODE v3.0 database), conserved region was highlighted in red. **B)** The secondary structures of *Palythoa* lncRNA (Unigene14915), conserved region was highlighted in red. Sequence alignment of the human and coral conserved regions was displayed in upper red elliptical frame. **C)** The secondary structures of target mRNA which was predicted to interact with lncRNA (Unigene14915). Interaction region was extracted from RNAplex RNA-RNA interaction prediction (free energy

required for hybridization predicted in RNApIex: -35.70). The interaction region in mRNA (Unigene65833, BLAST against nr annotation revealed that this mRNA may encode transcription factor, with accession No.: XP\_007473380, XP\_003214327, XP\_011490426, XP\_007112019, XP\_012906212, XP\_008103493, XP\_007112018, XP\_010815684) was highlighted in red. Details of sequences for hybridization were displayed in lower red elliptical frame. The secondary structures for all RNAs were predicted on RNAfold webserver.

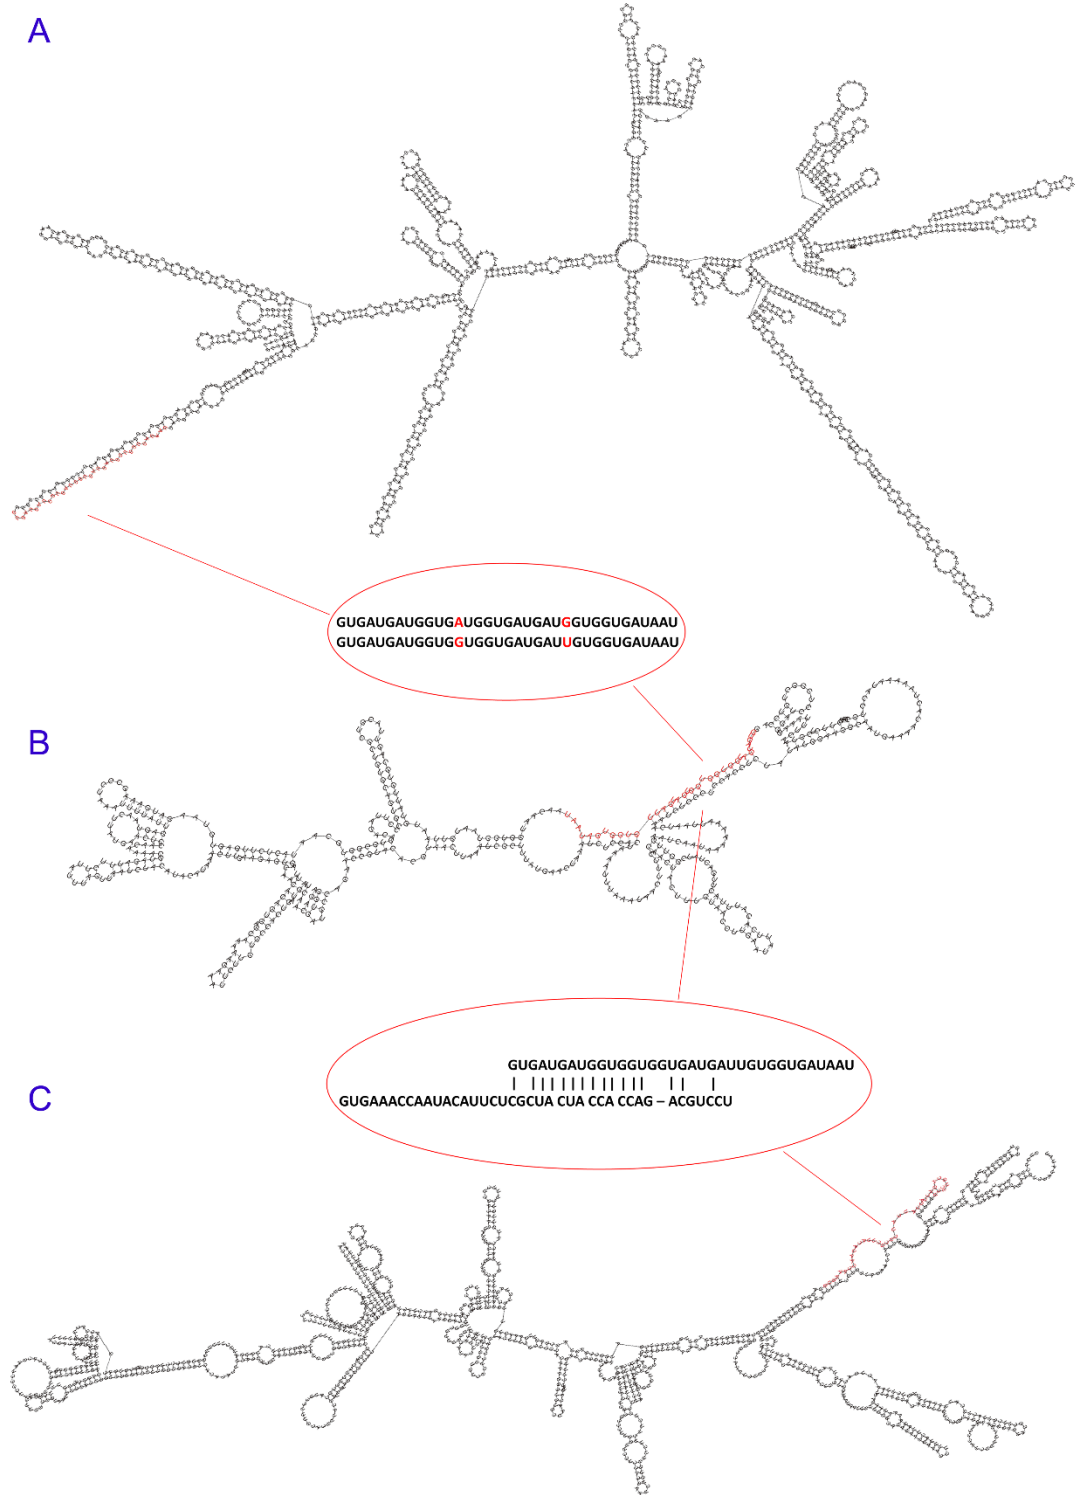

## Supplementary Tables

Table S1 Summary of lncRNA-mRNA interaction predicted based on RNAplex in *P. caribaeorum*.

| <i>P. caribaeorum</i><br>lncRNA ID | mRNAs with hybridization sites located in conserved region | mRNAs with high complementary base-pairing( $\geq 80\%$ ) | mRNAs with free energy lower than -20 |
|------------------------------------|------------------------------------------------------------|-----------------------------------------------------------|---------------------------------------|
| Unigene89595_All                   | 50255                                                      | 112                                                       | 104                                   |
| Unigene14915_All                   | 52454                                                      | 45                                                        | 45                                    |
| Unigene70263_All                   | 36190                                                      | 43                                                        | 40                                    |
| Unigene72836_All                   | 47774                                                      | 27                                                        | 26                                    |
| Unigene40263_All                   | 39649                                                      | 22                                                        | 22                                    |
| CL9785.Contig2_All                 | 50292                                                      | 19                                                        | 16                                    |
| Unigene63045_All                   | 7934                                                       | 24                                                        | 16                                    |
| Unigene102630_All                  | 49840                                                      | 15                                                        | 14                                    |
| Unigene53506_All                   | 42199                                                      | 15                                                        | 14                                    |
| CL1040.Contig5_All                 | 36809                                                      | 14                                                        | 14                                    |
| CL1040.Contig6_All                 | 36172                                                      | 14                                                        | 13                                    |
| Unigene2105_All                    | 53311                                                      | 13                                                        | 11                                    |
| Unigene39741_All                   | 27626                                                      | 19                                                        | 10                                    |
| Unigene49834_All                   | 41533                                                      | 11                                                        | 9                                     |
| Unigene61949_All                   | 49943                                                      | 7                                                         | 7                                     |
| CL1040.Contig1_All                 | 36713                                                      | 6                                                         | 6                                     |
| CL9996.Contig2_All                 | 49508                                                      | 9                                                         | 5                                     |
| Unigene60195_All                   | 21384                                                      | 5                                                         | 5                                     |
| Unigene29690_All                   | 37905                                                      | 5                                                         | 4                                     |
| Unigene9030_All                    | 6080                                                       | 6                                                         | 4                                     |
| Unigene56911_All                   | 53026                                                      | 4                                                         | 3                                     |
| CL7909.Contig1_All                 | 292                                                        | 4                                                         | 3                                     |
| Unigene23949_All                   | 9379                                                       | 6                                                         | 2                                     |
| Unigene64887_All                   | 941                                                        | 2                                                         | 2                                     |
| Unigene2220_All                    | 564                                                        | 3                                                         | 2                                     |
| Unigene3670_All                    | 198                                                        | 3                                                         | 2                                     |
| Unigene35955_All                   | 47263                                                      | 5                                                         | 1                                     |
| Unigene22615_All                   | 1658                                                       | 2                                                         | 1                                     |
| CL10350.Contig2_All                | 19                                                         | 1                                                         | 1                                     |
| CL6141.Contig4_All                 | 50013                                                      | 0                                                         | 0                                     |
| Unigene9191_All                    | 29227                                                      | 3                                                         | 0                                     |
| Unigene56469_All                   | 20109                                                      | 4                                                         | 0                                     |
| Unigene36322_All                   | 8259                                                       | 0                                                         | 0                                     |
| CL1102.Contig1_All                 | 4798                                                       | 0                                                         | 0                                     |
| Unigene88144_All                   | 4449                                                       | 0                                                         | 0                                     |
| Unigene22011_All                   | 1395                                                       | 0                                                         | 0                                     |
| Unigene22395_All                   | 1205                                                       | 0                                                         | 0                                     |
| CL1491.Contig1_All                 | 1106                                                       | 0                                                         | 0                                     |
| Unigene26574_All                   | 941                                                        | 0                                                         | 0                                     |



|                     |     |   |   |
|---------------------|-----|---|---|
| Unigene24008_All    | 536 | 0 | 0 |
| Unigene76351_All    | 444 | 0 | 0 |
| Unigene23102_All    | 443 | 0 | 0 |
| Unigene12276_All    | 341 | 0 | 0 |
| Unigene93514_All    | 329 | 0 | 0 |
| Unigene67286_All    | 323 | 0 | 0 |
| Unigene49840_All    | 318 | 0 | 0 |
| Unigene26118_All    | 308 | 0 | 0 |
| Unigene50184_All    | 291 | 0 | 0 |
| Unigene41692_All    | 286 | 0 | 0 |
| Unigene8984_All     | 249 | 0 | 0 |
| Unigene85491_All    | 209 | 0 | 0 |
| Unigene2194_All     | 188 | 0 | 0 |
| Unigene37819_All    | 170 | 0 | 0 |
| Unigene34830_All    | 154 | 1 | 0 |
| Unigene84770_All    | 131 | 0 | 0 |
| Unigene90867_All    | 93  | 0 | 0 |
| Unigene94275_All    | 66  | 0 | 0 |
| Unigene66881_All    | 53  | 1 | 0 |
| Unigene39492_All    | 39  | 0 | 0 |
| CL10350.Contig1_All | 36  | 0 | 0 |
| CL723.Contig2_All   | 25  | 0 | 0 |
| CL2237.Contig1_All  | 17  | 0 | 0 |
| CL11050.Contig1_All | 14  | 0 | 0 |
| Unigene39380_All    | 12  | 0 | 0 |
| Unigene44074_All    | 11  | 0 | 0 |
| CL642.Contig2_All   | 10  | 0 | 0 |
| Unigene22480_All    | 7   | 0 | 0 |
| Unigene32986_All    | 7   | 0 | 0 |
| Unigene65174_All    | 7   | 0 | 0 |
| Unigene61140_All    | 6   | 0 | 0 |
| Unigene50589_All    | 4   | 0 | 0 |
| CL9362.Contig1_All  | 4   | 0 | 0 |
| Unigene87777_All    | 4   | 0 | 0 |
| Unigene92982_All    | 4   | 0 | 0 |
| Unigene44595_All    | 3   | 0 | 0 |
| CL10736.Contig4_All | 3   | 0 | 0 |
| Unigene8108_All     | 3   | 0 | 0 |
| Unigene102120_All   | 2   | 0 | 0 |
| Unigene104851_All   | 2   | 0 | 0 |
| Unigene22452_All    | 2   | 0 | 0 |
| Unigene9322_All     | 2   | 0 | 0 |
| Unigene14_All       | 2   | 0 | 0 |
| Unigene56906_All    | 2   | 0 | 0 |
| Unigene43485_All    | 2   | 0 | 0 |
| Unigene10478_All    | 2   | 0 | 0 |
| Unigene9509_All     | 2   | 0 | 0 |
| CL8218.Contig3_All  | 2   | 0 | 0 |
| Unigene36593_All    | 2   | 0 | 0 |
| Unigene16462_All    | 1   | 0 | 0 |

|                    |   |   |   |
|--------------------|---|---|---|
| Unigene60170_All   | 1 | 0 | 0 |
| Unigene71355_All   | 1 | 0 | 0 |
| Unigene73002_All   | 1 | 0 | 0 |
| Unigene37956_All   | 1 | 0 | 0 |
| CL5008.Contig1_All | 1 | 0 | 0 |
| CL4621.Contig2_All | 1 | 0 | 0 |
| Unigene25828_All   | 1 | 0 | 0 |
| Unigene63062_All   | 1 | 0 | 0 |
| Unigene50030_All   | 1 | 0 | 0 |
| CL9.Contig3_All    | 1 | 0 | 0 |
| Unigene86657_All   | 1 | 0 | 0 |
| Unigene50075_All   | 1 | 0 | 0 |
| Unigene80323_All   | 1 | 0 | 0 |
| CL2084.Contig1_All | 1 | 0 | 0 |
| CL8569.Contig2_All | 1 | 0 | 0 |
| Unigene36319_All   | 1 | 0 | 0 |
| CL5008.Contig2_All | 1 | 0 | 0 |
| Unigene73318_All   | 1 | 0 | 0 |
| Unigene30249_All   | 1 | 0 | 0 |
| Unigene22880_All   | 1 | 0 | 0 |
| Unigene20717_All   | 1 | 0 | 0 |
| Unigene43899_All   | 1 | 0 | 0 |
| Unigene9459_All    | 1 | 0 | 0 |
| CL4392.Contig4_All | 1 | 0 | 0 |
| CL2719.Contig2_All | 1 | 0 | 0 |
| Unigene64790_All   | 1 | 0 | 0 |
| Unigene56653_All   | 1 | 0 | 0 |
| CL4490.Contig2_All | 1 | 0 | 0 |
| Unigene76828_All   | 1 | 0 | 0 |
| Unigene70256_All   | 1 | 0 | 0 |
| Unigene10244_All   | 1 | 0 | 0 |
| Unigene9745_All    | 1 | 0 | 0 |
| Unigene27300_All   | 1 | 0 | 0 |
| Unigene98246_All   | 1 | 0 | 0 |
| Unigene87955_All   | 1 | 0 | 0 |
| Unigene2266_All    | 1 | 0 | 0 |
| CL5834.Contig2_All | 1 | 0 | 0 |
| Unigene82196_All   | 1 | 0 | 0 |
| Unigene26491_All   | 1 | 0 | 0 |
| CL8569.Contig1_All | 1 | 0 | 0 |
| Unigene82707_All   | 1 | 0 | 0 |
| CL4621.Contig1_All | 0 | 0 | 0 |
| Unigene10186_All   | 0 | 0 | 0 |
| Unigene24155_All   | 0 | 0 | 0 |
| Unigene31177_All   | 0 | 0 | 0 |
| Unigene3654_All    | 0 | 0 | 0 |
| Unigene42022_All   | 0 | 0 | 0 |
| Unigene49751_All   | 0 | 0 | 0 |
| Unigene49832_All   | 0 | 0 | 0 |
| Unigene57101_All   | 0 | 0 | 0 |

|                  |   |   |   |
|------------------|---|---|---|
| Unigene71054_All | 0 | 0 | 0 |
| Unigene71734_All | 0 | 0 | 0 |
| Unigene74999_All | 0 | 0 | 0 |
| Unigene75592_All | 0 | 0 | 0 |
| Unigene80203_All | 0 | 0 | 0 |
| Unigene91279_All | 0 | 0 | 0 |

**Table S2 Summary of target mRNA annotation of 29 DELs in *P. caribaeorum*.**

| <b>lncRNA ID</b>    | <b>Interacted mRNA</b> | <b>mRNA Annotation</b>                           |
|---------------------|------------------------|--------------------------------------------------|
| CL10350.Contig2_All | Unigene98670_All       | transcriptase                                    |
| CL1040.Contig1_All  | Unigene30352_All       | uncharacterized protein                          |
| CL1040.Contig1_All  | Unigene45920_All       | SCO-spondin-like                                 |
| CL1040.Contig1_All  | Unigene55508_All       | hypothetical protein                             |
| CL1040.Contig1_All  | Unigene59190_All       | MFS transporter                                  |
| CL1040.Contig1_All  | Unigene8463_All        | hypothetical protein                             |
| CL1040.Contig1_All  | Unigene88175_All       | beta-hydroxylase                                 |
| CL1040.Contig5_All  | CL3674.Contig2_All     | Plasma membrane iron permease                    |
| CL1040.Contig5_All  | Unigene1669_All        | AT-rich interactive domain-containing protein    |
| CL1040.Contig5_All  | Unigene21311_All       | Unannotated                                      |
| CL1040.Contig5_All  | Unigene29083_All       | oxidoreductase                                   |
| CL1040.Contig5_All  | Unigene30352_All       | uncharacterized protein                          |
| CL1040.Contig5_All  | Unigene41966_All       | hydroxylase/oxygenase                            |
| CL1040.Contig5_All  | Unigene43654_All       | Unannotated                                      |
| CL1040.Contig5_All  | Unigene45920_All       | SCO-spondin-like                                 |
| CL1040.Contig5_All  | Unigene46088_All       | Ankyrin repeat family protein                    |
| CL1040.Contig5_All  | Unigene55508_All       | hypothetical protein                             |
| CL1040.Contig5_All  | Unigene59190_All       | MFS transporter                                  |
| CL1040.Contig5_All  | Unigene61123_All       | copine-4                                         |
| CL1040.Contig5_All  | Unigene65307_All       | ASCH domain-containing protein                   |
| CL1040.Contig5_All  | Unigene88175_All       | beta-hydroxylase                                 |
| CL1040.Contig6_All  | Unigene21045_All       | EGF and pentraxin domain-containing protein      |
| CL1040.Contig6_All  | Unigene21311_All       | Unannotated                                      |
| CL1040.Contig6_All  | Unigene29516_All       | DOM3 exoribonuclease                             |
| CL1040.Contig6_All  | Unigene43654_All       | Unannotated                                      |
| CL1040.Contig6_All  | Unigene45920_All       | SCO-spondin-like                                 |
| CL1040.Contig6_All  | Unigene53451_All       | beta-galactosidase-like                          |
| CL1040.Contig6_All  | Unigene53871_All       | metallo-beta-lactamase domain-containing protein |
| CL1040.Contig6_All  | Unigene55508_All       | hypothetical protein                             |
| CL1040.Contig6_All  | Unigene61818_All       | PKSN polyketide synthase                         |
| CL1040.Contig6_All  | Unigene65307_All       | ASCH domain-containing protein                   |
| CL1040.Contig6_All  | Unigene7691_All        | hypothetical protein                             |
| CL1040.Contig6_All  | Unigene7979_All        | hypothetical protein                             |
| CL1040.Contig6_All  | Unigene88175_All       | beta-hydroxylase                                 |
| CL7909.Contig1_All  | CL2716.Contig3_All     | predicted protein                                |
| CL7909.Contig1_All  | CL2716.Contig4_All     | 17-alpha-hydroxylase                             |

|                    |                     |                                                           |
|--------------------|---------------------|-----------------------------------------------------------|
| CL7909.Contig1_All | CL2716.Contig5_All  | predicted protein                                         |
| CL9785.Contig2_All | CL2200.Contig2_All  | Unannotated                                               |
| CL9785.Contig2_All | CL6342.Contig2_All  | gamma-glutamyltranspeptidase                              |
| CL9785.Contig2_All | CL6342.Contig3_All  | gamma-glutamyltranspeptidase                              |
| CL9785.Contig2_All | CL77.Contig3_All    | low-density lipoprotein receptor-related protein          |
| CL9785.Contig2_All | CL77.Contig4_All    | low-density lipoprotein receptor-related protein          |
| CL9785.Contig2_All | Unigene11638_All    | ABC transporter ATP-binding protein                       |
| CL9785.Contig2_All | Unigene12015_All    | nuclear factor NF-kappa-B                                 |
| CL9785.Contig2_All | Unigene15108_All    | Unannotated                                               |
| CL9785.Contig2_All | Unigene19278_All    | strombine dehydrogenase                                   |
| CL9785.Contig2_All | Unigene21400_All    | regulatory ankyrin repeat subunit B-like isoform X2       |
| CL9785.Contig2_All | Unigene28365_All    | selenoprotein SelM2                                       |
| CL9785.Contig2_All | Unigene34632_All    | uncharacterized protein                                   |
| CL9785.Contig2_All | Unigene34709_All    | Brefeldin A-inhibited guanine nucleotide-exchange protein |
| CL9785.Contig2_All | Unigene38690_All    | predicted protein                                         |
| CL9785.Contig2_All | Unigene40168_All    | DEAD/DEAH box helicase                                    |
| CL9785.Contig2_All | Unigene48176_All    | Unannotated                                               |
| CL9996.Contig2_All | CL1636.Contig2_All  | Unannotated                                               |
| CL9996.Contig2_All | CL6680.Contig2_All  | centrosomal protein of 19 kDa                             |
| CL9996.Contig2_All | Unigene25859_All    | acyl-coenzyme A thioesterase                              |
| CL9996.Contig2_All | Unigene59116_All    | neuroligin-4, X-linked isoform X2                         |
| CL9996.Contig2_All | Unigene6467_All     | leucine rich repeat-containing protein                    |
| Unigene102630_All  | CL10751.Contig2_All | ATP-dependent RNA helicase                                |
| Unigene102630_All  | CL5978.Contig1_All  | 3-phosphoglycerate dehydrogenase                          |
| Unigene102630_All  | CL5978.Contig2_All  | 3-phosphoglycerate dehydrogenase                          |
| Unigene102630_All  | CL8390.Contig1_All  | hypothetical protein                                      |
| Unigene102630_All  | CL8390.Contig2_All  | predicted protein                                         |
| Unigene102630_All  | CL8390.Contig3_All  | hypothetical protein                                      |
| Unigene102630_All  | CL8390.Contig4_All  | predicted protein                                         |
| Unigene102630_All  | Unigene12184_All    | zinc finger MYM-type protein 3                            |
| Unigene102630_All  | Unigene13965_All    | small RNA degrading nuclease                              |
| Unigene102630_All  | Unigene19492_All    | CST complex subunit TEN1                                  |
| Unigene102630_All  | Unigene35606_All    | unknown protein                                           |
| Unigene102630_All  | Unigene35656_All    | Enhancer of rudimentary like protein                      |
| Unigene102630_All  | Unigene42578_All    | hypothetical protein                                      |
| Unigene102630_All  | Unigene44349_All    | Unannotated                                               |
| Unigene14915_All   | CL1193.Contig2_All  | serine hydrolase                                          |
| Unigene14915_All   | CL139.Contig1_All   | Unannotated                                               |
| Unigene14915_All   | CL139.Contig2_All   | Unannotated                                               |
| Unigene14915_All   | CL4384.Contig1_All  | regulator of nonsense transcripts                         |
| Unigene14915_All   | CL531.Contig2_All   | phosphatidylethanolamine-binding protein                  |
| Unigene14915_All   | CL531.Contig3_All   | phosphatidylethanolamine-binding protein                  |
| Unigene14915_All   | CL5366.Contig3_All  | serine-arginine protein 55 isoform X7                     |
| Unigene14915_All   | CL5627.Contig3_All  | senescence-associated protein                             |
| Unigene14915_All   | CL6122.Contig1_All  | predicted protein                                         |
| Unigene14915_All   | CL6726.Contig2_All  | sodium-dependent multivitamin transporter                 |
| Unigene14915_All   | CL7262.Contig1_All  | protein boule-like                                        |
| Unigene14915_All   | CL7289.Contig1_All  | lipoygenase                                               |
| Unigene14915_All   | CL7289.Contig2_All  | lipoygenase                                               |

|                  |                    |                                                                         |
|------------------|--------------------|-------------------------------------------------------------------------|
| Unigene14915_All | CL7425.Contig1_All | zinc transporter 7                                                      |
| Unigene14915_All | CL8285.Contig1_All | hypothetical protein                                                    |
| Unigene14915_All | Unigene14878_All   | 5' AMP activated protein kinase                                         |
| Unigene14915_All | Unigene20290_All   | cytochrome c oxidase subunit                                            |
| Unigene14915_All | Unigene20643_All   | calcium-binding protein                                                 |
| Unigene14915_All | Unigene222_All     | predicted protein                                                       |
| Unigene14915_All | Unigene24745_All   | voltage-gated sodium channel                                            |
| Unigene14915_All | Unigene27869_All   | Multisite-specific tRNA:(cytosine-C(5))-methyltransferase               |
| Unigene14915_All | Unigene29045_All   | ATP-dependent DNA helicase                                              |
| Unigene14915_All | Unigene29285_All   | uncharacterized protein                                                 |
| Unigene14915_All | Unigene33387_All   | glycosyl hydrolase                                                      |
| Unigene14915_All | Unigene34046_All   | alpha-1,6-mannosylglycoprotein 6-beta-N-acetylglucosaminyltransferase A |
| Unigene14915_All | Unigene38136_All   | MYND finger domain-containing protein                                   |
| Unigene14915_All | Unigene38282_All   | sulfate transporter                                                     |
| Unigene14915_All | Unigene39647_All   | RNA-directed DNA polymerase                                             |
| Unigene14915_All | Unigene42064_All   | GNAT family N-acetyltransferase                                         |
| Unigene14915_All | Unigene47931_All   | lipoprotein receptor-related protein                                    |
| Unigene14915_All | Unigene48466_All   | hypothetical protein                                                    |
| Unigene14915_All | Unigene49140_All   | uncharacterized protein                                                 |
| Unigene14915_All | Unigene49312_All   | potassium channel                                                       |
| Unigene14915_All | Unigene52317_All   | protein ELC-like                                                        |
| Unigene14915_All | Unigene5272_All    | Unannotated                                                             |
| Unigene14915_All | Unigene53522_All   | Unannotated                                                             |
| Unigene14915_All | Unigene53679_All   | membrane protein                                                        |
| Unigene14915_All | Unigene54284_All   | 40S ribosomal protein                                                   |
| Unigene14915_All | Unigene59365_All   | amino acid permease                                                     |
| Unigene14915_All | Unigene65652_All   | 39S ribosomal protein                                                   |
| Unigene14915_All | Unigene65833_All   | transcription factor                                                    |
| Unigene14915_All | Unigene66111_All   | Krueppel-like factor 6 isoform X2                                       |
| Unigene14915_All | Unigene73090_All   | Tenascin-X                                                              |
| Unigene14915_All | Unigene87385_All   | metallophosphoesterase                                                  |
| Unigene14915_All | sodium-dependent   | multivitamin transporter isoform X3                                     |
| Unigene2105_All  | CL1591.Contig2_All | ATP-binding cassette protein C4-like                                    |
| Unigene2105_All  | CL2983.Contig1_All | tight junction protein                                                  |
| Unigene2105_All  | CL2983.Contig2_All | tight junction protein ZO-1 isoform                                     |
| Unigene2105_All  | CL3469.Contig1_All | acetylcholine receptor subunit                                          |
| Unigene2105_All  | Unigene11307_All   | predicted protein                                                       |
| Unigene2105_All  | Unigene38919_All   | ubiquitin thiolesterase                                                 |
| Unigene2105_All  | Unigene41420_All   | Xaa-Pro aminopeptidase                                                  |
| Unigene2105_All  | Unigene59316_All   | unknown protein                                                         |
| Unigene2105_All  | Unigene62479_All   | Na channel protein                                                      |
| Unigene2105_All  | Unigene67843_All   | unknown protein                                                         |
| Unigene2105_All  | Unigene7486_All    | transcription factor 3C polypeptide                                     |
| Unigene2220_All  | CL2572.Contig2_All | acyl-CoA-binding protein                                                |
| Unigene2220_All  | Unigene61766_All   | RNA-directed DNA polymerase                                             |
| Unigene22615_All | Unigene9021_All    | Unannotated                                                             |
| Unigene23949_All | CL5109.Contig2_All | Unannotated                                                             |
| Unigene23949_All | Unigene43049_All   | Unannotated                                                             |

|                  |                    |                                                               |
|------------------|--------------------|---------------------------------------------------------------|
| Unigene29690_All | CL3197.Contig2_All | PEP-CTERM domain protein                                      |
| Unigene29690_All | CL4559.Contig1_All | anaphase-promoting complex subunit 6                          |
| Unigene29690_All | Unigene33586_All   | hypothetical protein                                          |
| Unigene29690_All | Unigene5996_All    | myelin transcription factor                                   |
| Unigene35955_All | CL9649.Contig1_All | polyadenylate-binding protein                                 |
| Unigene3670_All  | CL5066.Contig2_All | endonuclease-reverse transcriptase                            |
| Unigene3670_All  | Unigene21558_All   | reverse transcriptase                                         |
| Unigene39741_All | CL1393.Contig1_All | predicted protein                                             |
| Unigene39741_All | CL1393.Contig3_All | hypothetical protein                                          |
| Unigene39741_All | CL149.Contig1_All  | titin-like                                                    |
| Unigene39741_All | CL149.Contig2_All  | predicted protein                                             |
| Unigene39741_All | Unigene22169_All   | ATP-dependent DNA helicase                                    |
| Unigene39741_All | Unigene34466_All   | Golgi-associated PDZ and coiled-coil motif-containing protein |
| Unigene39741_All | Unigene49141_All   | ceramide-1-phosphate transfer                                 |
| Unigene39741_All | Unigene52733_All   | isocitrate dehydrogenase [NAD] subunit                        |
| Unigene39741_All | Unigene54339_All   | rRNA-processing protein FCF1-like protein                     |
| Unigene39741_All | Unigene65966_All   | vacuolar protein sorting-associated protein                   |
| Unigene40263_All | CL2327.Contig2_All | hypothetical protein                                          |
| Unigene40263_All | CL2883.Contig1_All | T-complex protein 1 subunit                                   |
| Unigene40263_All | CL2883.Contig2_All | T-complex protein 1 subunit                                   |
| Unigene40263_All | CL2924.Contig5_All | hypothetical protein                                          |
| Unigene40263_All | CL4384.Contig1_All | regulator of nonsense transcripts                             |
| Unigene40263_All | CL531.Contig2_All  | phosphatidylethanolamine-binding protein                      |
| Unigene40263_All | Unigene18545_All   | hypothetical protein                                          |
| Unigene40263_All | Unigene45723_All   | NHL repeat containing protein                                 |
| Unigene40263_All | Unigene48296_All   | flavin oxidoreductase                                         |
| Unigene40263_All | Unigene49084_All   | hypothetical protein                                          |
| Unigene40263_All | Unigene49098_All   | dentin sialophosphoprotein-like isoform X1                    |
| Unigene40263_All | Unigene52818_All   | hypothetical protein                                          |
| Unigene40263_All | Unigene54402_All   | phosphoribosylformylglycinamide cyclo-ligase                  |
| Unigene40263_All | Unigene55086_All   | LMBR1 domain-containing protein                               |
| Unigene40263_All | Unigene55538_All   | CAMK family protein kinase                                    |
| Unigene40263_All | Unigene59365_All   | amino acid permease                                           |
| Unigene40263_All | Unigene62283_All   | phosphoacetylglucosamine mutase                               |
| Unigene40263_All | Unigene62363_All   | zinc transporter                                              |
| Unigene40263_All | Unigene66055_All   | serine/arginine-rich splicing factor                          |
| Unigene40263_All | Unigene66164_All   | protein mig c                                                 |
| Unigene40263_All | Unigene80006_All   | hypothetical protein                                          |
| Unigene40263_All | Unigene87385_All   | metallophosphoesterase                                        |
| Unigene49834_All | CL2593.Contig1_All | uncharacterized protein                                       |
| Unigene49834_All | CL2895.Contig2_All | serine/threonine-protein kinase MARK1                         |
| Unigene49834_All | CL2895.Contig3_All | serine/threonine-protein kinase                               |
| Unigene49834_All | CL2895.Contig4_All | serine/threonine-protein kinase MARK1                         |
| Unigene49834_All | CL2895.Contig5_All | MAP/microtubule affinity-regulating kinase                    |
| Unigene49834_All | Unigene2609_All    | tubulin polymerization-promoting protein                      |
| Unigene49834_All | Unigene43528_All   | cullin-associated NEDD8-dissociated protein                   |
| Unigene49834_All | Unigene47977_All   | low affinity copper uptake protein                            |
| Unigene49834_All | Unigene60754_All   | Unannotated                                                   |
| Unigene53506_All | Unigene17780_All   | ADPribosylglycohydrolas                                       |

|                  |                    |                                                         |
|------------------|--------------------|---------------------------------------------------------|
| Unigene53506_All | Unigene18874_All   | hypothetical protein                                    |
| Unigene53506_All | Unigene19980_All   | arginine N-methyltransferase                            |
| Unigene53506_All | Unigene21350_All   | hypothetical protein                                    |
| Unigene53506_All | Unigene23498_All   | lymphoid-specific helicase isoform X1                   |
| Unigene53506_All | Unigene32147_All   | tetratricopeptide repeat-containing protein             |
| Unigene53506_All | Unigene32368_All   | hypothetical protein                                    |
| Unigene53506_All | Unigene40541_All   | Unannotated                                             |
| Unigene53506_All | Unigene41423_All   | transposase                                             |
| Unigene53506_All | Unigene44911_All   | aminotransferase                                        |
| Unigene53506_All | Unigene5084_All    | Bardet-Biedl syndrome                                   |
| Unigene53506_All | Unigene63760_All   | hypothetical protein                                    |
| Unigene53506_All | Unigene7677_All    | histidine ammonia-lyase isoform                         |
| Unigene53506_All | Unigene8709_All    | GPN-loop GTPase 3-like                                  |
| Unigene56911_All | Unigene18046_All   | membrane protein                                        |
| Unigene56911_All | Unigene40638_All   | calcium-binding protein                                 |
| Unigene56911_All | Unigene51874_All   | protein disulfide-isomerase                             |
| Unigene60195_All | Unigene10965_All   | soluble calcium-activated nucleotidase                  |
| Unigene60195_All | Unigene26442_All   | uncharacterized protein                                 |
| Unigene60195_All | Unigene48554_All   | Unannotated                                             |
| Unigene60195_All | Unigene52108_All   | biliverdin reductase A                                  |
| Unigene60195_All | Unigene73090_All   | Tenascin-X                                              |
| Unigene61949_All | CL2363.Contig1_All | translation initiation factor eIF-2B subunit            |
| Unigene61949_All | CL736.Contig1_All  | 2-acylglycerol O-acyltransferase                        |
| Unigene61949_All | CL9532.Contig1_All | tetratricopeptide repeat protein                        |
| Unigene61949_All | Unigene19097_All   | translation initiation factor                           |
| Unigene61949_All | Unigene25151_All   | Clathrin interactor 1                                   |
| Unigene61949_All | Unigene29646_All   | alpha-ketoglutarate-dependent dioxygenase               |
| Unigene61949_All | Unigene39647_All   | RNA-directed DNA polymerase                             |
| Unigene63045_All | CL149.Contig10_All | predicted protein                                       |
| Unigene63045_All | CL149.Contig1_All  | titin-like                                              |
| Unigene63045_All | CL149.Contig2_All  | predicted protein                                       |
| Unigene63045_All | CL149.Contig8_All  | predicted protein                                       |
| Unigene63045_All | CL2262.Contig7_All | Unannotated                                             |
| Unigene63045_All | CL4531.Contig1_All | CCR4-NOT transcription complex subunit                  |
| Unigene63045_All | CL4531.Contig2_All | CCR4-NOT transcription complex subunit                  |
| Unigene63045_All | CL661.Contig4_All  | succinate dehydrogenase assembly factor                 |
| Unigene63045_All | CL7643.Contig2_All | SCF E3 ubiquitin ligase complex F-box protein           |
| Unigene63045_All | Unigene24611_All   | uncharacterized protein                                 |
| Unigene63045_All | Unigene34106_All   | RNA-directed DNA polymerase                             |
| Unigene63045_All | Unigene40498_All   | predicted protein                                       |
| Unigene63045_All | Unigene49356_All   | pol-like protein                                        |
| Unigene63045_All | Unigene54767_All   | transient receptor potential cation channel subfamily A |
| Unigene63045_All | Unigene65480_All   | RNA polymerase II elongation factor                     |
| Unigene63045_All | Unigene8021_All    | SPRY domain-containing protein                          |
| Unigene64887_All | CL6529.Contig1_All | Unannotated                                             |
| Unigene64887_All | Unigene81338_All   | Unannotated                                             |
| Unigene70263_All | CL1243.Contig1_All | host cell factor                                        |
| Unigene70263_All | CL1243.Contig2_All | host cell factor                                        |
| Unigene70263_All | CL1243.Contig3_All | host cell factor                                        |

|                  |                    |                                                                        |
|------------------|--------------------|------------------------------------------------------------------------|
| Unigene70263_All | CL1773.Contig3_All | hemicentin-1 isoform                                                   |
| Unigene70263_All | CL1773.Contig5_All | hemicentin-2 isoform                                                   |
| Unigene70263_All | CL2009.Contig1_All | hypothetical protein                                                   |
| Unigene70263_All | CL2856.Contig1_All | endonuclease-reverse transcriptase                                     |
| Unigene70263_All | CL3084.Contig2_All | RING finger and CHY zinc finger domain-containing protein              |
| Unigene70263_All | CL452.Contig2_All  | predicted protein                                                      |
| Unigene70263_All | CL4665.Contig1_All | Unannotated                                                            |
| Unigene70263_All | CL4840.Contig1_All | BRCA2 and CDKN1A-interacting protein                                   |
| Unigene70263_All | CL4840.Contig2_All | uncharacterized protein                                                |
| Unigene70263_All | CL625.Contig2_All  | rabankyrin-5 isoform                                                   |
| Unigene70263_All | CL6784.Contig1_All | alpha-1,3-mannosyl-glycoprotein 4-beta-N-acetylglucosaminyltransferase |
| Unigene70263_All | CL7118.Contig2_All | hypothetical protein                                                   |
| Unigene70263_All | CL8374.Contig1_All | hypothetical protein                                                   |
| Unigene70263_All | CL8374.Contig2_All | uncharacterized protein                                                |
| Unigene70263_All | CL8425.Contig1_All | 4-substituted benzoates-glutamate ligase                               |
| Unigene70263_All | SPRY               | domain-containing protein                                              |
| Unigene70263_All | Unigene11424_All   | succinate dehydrogenase cytochrome b560 subunit                        |
| Unigene70263_All | Unigene13101_All   | Protein kinase C epsilon type                                          |
| Unigene70263_All | Unigene1804_All    | Steroid 17-alpha-hydroxylase                                           |
| Unigene70263_All | Unigene21183_All   | glycohydrolase                                                         |
| Unigene70263_All | Unigene22169_All   | ATP-dependent DNA helicase                                             |
| Unigene70263_All | Unigene27762_All   | zinc finger protein                                                    |
| Unigene70263_All | Unigene34189_All   | kinesin family member 3C isoform                                       |
| Unigene70263_All | Unigene40101_All   | DNA replication complex GINS protein                                   |
| Unigene70263_All | Unigene40498_All   | predicted protein                                                      |
| Unigene70263_All | Unigene48396_All   | WD repeat domain phosphoinositide-interacting protein                  |
| Unigene70263_All | Unigene49293_All   | palmitoyltransferase                                                   |
| Unigene70263_All | Unigene49356_All   | pol-like protein                                                       |
| Unigene70263_All | Unigene58079_All   | Unannotated                                                            |
| Unigene70263_All | Unigene58936_All   | CAP-Gly domain-containing linker protein                               |
| Unigene70263_All | Unigene61766_All   | RNA-directed DNA polymerase                                            |
| Unigene70263_All | Unigene65615_All   | N-alpha-acetyltransferase                                              |
| Unigene70263_All | Unigene69925_All   | hypothetical protein                                                   |
| Unigene70263_All | Unigene8021_All    | SPRY domain-containing protein                                         |
| Unigene70263_All | Unigene8051_All    | voltage-gated sodium channel                                           |
| Unigene70263_All | Unigene80640_All   | hypothetical protein                                                   |
| Unigene70263_All | Unigene8711_All    | CUE domain-containing protein                                          |
| Unigene72836_All | CL1026.Contig2_All | protein IMPACT isoform                                                 |
| Unigene72836_All | CL1296.Contig2_All | hypothetical protein                                                   |
| Unigene72836_All | CL1627.Contig3_All | hypothetical protein                                                   |
| Unigene72836_All | CL1858.Contig3_All | protein spinster homolog 1-like isoform                                |
| Unigene72836_All | CL1858.Contig4_All | protein spinster homolog 1-like isoform                                |
| Unigene72836_All | CL578.Contig1_All  | sphingosine-1-phosphate phosphatase                                    |
| Unigene72836_All | CL8544.Contig4_All | sodium/myo-inositol cotransporter                                      |
| Unigene72836_All | CL9822.Contig2_All | predicted protein                                                      |
| Unigene72836_All | Unigene13140_All   | predicted protein                                                      |
| Unigene72836_All | Unigene25481_All   | FH1/FH2 domain-containing protein                                      |
| Unigene72836_All | Unigene36298_All   | ion transporter                                                        |



|                  |                      |                                                                           |
|------------------|----------------------|---------------------------------------------------------------------------|
| Unigene72836_All | Unigene38745_All     | predicted protein                                                         |
| Unigene72836_All | Unigene39669_All     | Membrane associated eicosanoid/glutathione metabolism-like domain protein |
| Unigene72836_All | Unigene42597_All     | testis-expressed sequence 2 protein                                       |
| Unigene72836_All | Unigene45783_All     | tetratricopeptide TPR_2 repeat protein                                    |
| Unigene72836_All | Unigene47478_All     | phosphatidylserine synthase                                               |
| Unigene72836_All | Unigene50803_All     | DNA helicase MCM8                                                         |
| Unigene72836_All | Unigene52409_All     | Kunitz/Bovine pancreatic trypsin inhibitor domain protein                 |
| Unigene72836_All | Unigene54193_All     | guanylate cyclase soluble subunit                                         |
| Unigene72836_All | Unigene566_All       | helicase with zinc finger domain                                          |
| Unigene72836_All | Unigene59493_All     | hypothetical protein                                                      |
| Unigene72836_All | Unigene62698_All     | phytanoyl-CoA dioxygenase domain-containing protein                       |
| Unigene72836_All | Unigene62813_All     | gastrula zinc finger protein                                              |
| Unigene72836_All | Unigene67293_All     | copper/zinc superoxide dismutase                                          |
| Unigene72836_All | Unigene90891_All     | Growth factor receptor-bound protein                                      |
| Unigene72836_All | Unigene9829_All      | protein spinster homolog 1-like isoform                                   |
| Unigene89595_All | CL10387.Contig1_All  | nuclear factor 1 C-type-like isoform                                      |
| Unigene89595_All | CL10695.Contig1_All  | 4-hydroxybenzoyl-CoA thioesterase                                         |
| Unigene89595_All | CL10913.Contig1_All  | Unannotated                                                               |
| Unigene89595_All | CL10956.Contig11_All | truncated actin-4                                                         |
| Unigene89595_All | CL10956.Contig6_All  | muscle-specific actin-like                                                |
| Unigene89595_All | CL1225.Contig1_All   | ecto-NOX disulfide-thiol exchanger                                        |
| Unigene89595_All | CL1236.Contig1_All   | FGFR1 oncogene partner 2 isoform                                          |
| Unigene89595_All | CL1782.Contig2_All   | uncharacterized protein                                                   |
| Unigene89595_All | CL1782.Contig5_All   | uncharacterized protein                                                   |
| Unigene89595_All | CL1782.Contig6_All   | uncharacterized protein                                                   |
| Unigene89595_All | CL1787.Contig1_All   | hypothetical protein                                                      |
| Unigene89595_All | CL208.Contig1_All    | tripartite motif-containing protein 45 isoform                            |
| Unigene89595_All | CL208.Contig2_All    | filamin-A isoform                                                         |
| Unigene89595_All | CL208.Contig3_All    | predicted protein                                                         |
| Unigene89595_All | CL2387.Contig4_All   | lissencephaly-1 homolog                                                   |
| Unigene89595_All | CL267.Contig10_All   | zinc finger MIZ domain-containing protein                                 |
| Unigene89595_All | CL267.Contig11_All   | zinc finger MIZ domain-containing protein                                 |
| Unigene89595_All | CL267.Contig12_All   | zinc finger MIZ domain-containing protein                                 |
| Unigene89595_All | CL267.Contig13_All   | zinc finger MIZ domain-containing protein                                 |
| Unigene89595_All | CL267.Contig14_All   | zinc finger MIZ domain-containing protein                                 |
| Unigene89595_All | CL267.Contig15_All   | zinc finger MIZ domain-containing protein                                 |
| Unigene89595_All | CL267.Contig16_All   | zinc finger MIZ domain-containing protein                                 |
| Unigene89595_All | CL267.Contig17_All   | zinc finger MIZ domain-containing protein                                 |
| Unigene89595_All | CL267.Contig18_All   | zinc finger MIZ domain-containing protein                                 |
| Unigene89595_All | CL267.Contig19_All   | zinc finger MIZ domain-containing protein 1-like                          |
| Unigene89595_All | CL267.Contig20_All   | zinc finger MIZ domain-containing protein                                 |
| Unigene89595_All | CL267.Contig21_All   | zinc finger MIZ domain-containing protein                                 |
| Unigene89595_All | CL267.Contig22_All   | zinc finger MIZ domain-containing protein                                 |
| Unigene89595_All | CL267.Contig23_All   | Zinc finger MIZ domain-containing protein                                 |
| Unigene89595_All | CL267.Contig24_All   | zinc finger MIZ domain-containing protein                                 |
| Unigene89595_All | CL267.Contig26_All   | zinc finger MIZ domain-containing protein                                 |
| Unigene89595_All | CL267.Contig27_All   | zinc finger MIZ domain-containing protein                                 |
| Unigene89595_All | CL267.Contig4_All    | zinc finger MIZ domain-containing protein                                 |

|                  |                    |                                                                     |
|------------------|--------------------|---------------------------------------------------------------------|
| Unigene89595_All | CL267.Contig5_All  | zinc finger MIZ domain-containing protein                           |
| Unigene89595_All | CL267.Contig6_All  | zinc finger MIZ domain-containing protein                           |
| Unigene89595_All | CL267.Contig7_All  | zinc finger MIZ domain-containing protein                           |
| Unigene89595_All | CL267.Contig8_All  | zinc finger MIZ domain-containing protein                           |
| Unigene89595_All | CL267.Contig9_All  | zinc finger MIZ domain-containing protein                           |
| Unigene89595_All | CL2693.Contig1_All | NB-ARC domain containing protein                                    |
| Unigene89595_All | CL3123.Contig2_All | nicotinamidase                                                      |
| Unigene89595_All | CL3123.Contig3_All | nicotinamidase                                                      |
| Unigene89595_All | CL3123.Contig5_All | nicotinamidase                                                      |
| Unigene89595_All | CL3123.Contig8_All | nicotinamidase-like                                                 |
| Unigene89595_All | CL3630.Contig1_All | hypothetical protein                                                |
| Unigene89595_All | CL3630.Contig2_All | hypothetical protein                                                |
| Unigene89595_All | CL3853.Contig1_All | hypothetical protein                                                |
| Unigene89595_All | CL4079.Contig1_All | ras-related protein                                                 |
| Unigene89595_All | CL4079.Contig2_All | ras-related protein Rab-13                                          |
| Unigene89595_All | CL4079.Contig3_All | ras-related protein Rab-13                                          |
| Unigene89595_All | CL4223.Contig1_All | hypothetical protein                                                |
| Unigene89595_All | CL556.Contig1_All  | 7-methylguanosine phosphate-specific 5'-nucleotidase A-like isoform |
| Unigene89595_All | CL556.Contig2_All  | 7-methylguanosine phosphate-specific 5'-nucleotidase A-like         |
| Unigene89595_All | CL736.Contig1_All  | 2-acylglycerol O-acyltransferase                                    |
| Unigene89595_All | CL7650.Contig1_All | predicted protein                                                   |
| Unigene89595_All | CL773.Contig7_All  | calcium binding EGF domain protein                                  |
| Unigene89595_All | CL786.Contig6_All  | uncharacterized protein                                             |
| Unigene89595_All | CL90.Contig2_All   | mRNA-decapping enzyme                                               |
| Unigene89595_All | CL9717.Contig1_All | uncharacterized protein                                             |
| Unigene89595_All | CL9717.Contig2_All | uncharacterized protein                                             |
| Unigene89595_All | CL982.Contig3_All  | Crystal Structure Of Engineered Protein                             |
| Unigene89595_All | Unigene100976_All  | metallophosphoesterase                                              |
| Unigene89595_All | Unigene11443_All   | protein BTG1-like                                                   |
| Unigene89595_All | Unigene13472_All   | nudC domain-containing protein                                      |
| Unigene89595_All | Unigene13535_All   | thioredoxin                                                         |
| Unigene89595_All | Unigene13673_All   | uncharacterized protein                                             |
| Unigene89595_All | Unigene16098_All   | transcription elongation regulator                                  |
| Unigene89595_All | Unigene16937_All   | hypothetical protein                                                |
| Unigene89595_All | Unigene18453_All   | complement component C3 precursor                                   |
| Unigene89595_All | Unigene18878_All   | cytochrome B5                                                       |
| Unigene89595_All | Unigene21644_All   | nuclear transcription factor                                        |
| Unigene89595_All | Unigene25782_All   | unknown protein                                                     |
| Unigene89595_All | Unigene27665_All   | selenocysteine-specific elongation factor isoform                   |
| Unigene89595_All | Unigene27978_All   | chromosome-associated kinesin KIF4                                  |
| Unigene89595_All | Unigene28589_All   | disintegrin and metalloproteinase domain-containing protein         |
| Unigene89595_All | Unigene33215_All   | 14 kDa subunit splicing factor 3b                                   |
| Unigene89595_All | Unigene34189_All   | kinesin family member 3C isoform                                    |
| Unigene89595_All | Unigene34787_All   | loricrin-like isoform                                               |
| Unigene89595_All | Unigene36063_All   | unconventional myosin-IXb-like isoform                              |
| Unigene89595_All | Unigene38515_All   | predicted protein                                                   |
| Unigene89595_All | Unigene42938_All   | predicted protein                                                   |
| Unigene89595_All | Unigene4482_All    | hypothetical protein                                                |

|                  |                      |                                               |
|------------------|----------------------|-----------------------------------------------|
| Unigene89595_All | Unigene45123_All     | tektin-1 isoform                              |
| Unigene89595_All | Unigene46169_All     | aly/REF export factor                         |
| Unigene89595_All | Unigene47476_All     | endoglucanase                                 |
| Unigene89595_All | Unigene48714_All     | placenta-specific gene                        |
| Unigene89595_All | Unigene48897_All     | DENN domain-containing protein                |
| Unigene89595_All | Unigene49495_All     | GTP-binding protein                           |
| Unigene89595_All | Unigene5198_All      | predicted protein                             |
| Unigene89595_All | Unigene54753_All     | Transposon Ty3-I Gag-Pol polyprotein          |
| Unigene89595_All | Unigene55715_All     | RNA-directed DNA polymerase                   |
| Unigene89595_All | Unigene58773_All     | uncharacterized protein                       |
| Unigene89595_All | Unigene58846_All     | LDLR chaperone MESD                           |
| Unigene89595_All | Unigene60583_All     | translation initiation factor                 |
| Unigene89595_All | Unigene61677_All     | predicted protein                             |
| Unigene89595_All | Unigene62595_All     | S-adenosylmethionine synthase isoform         |
| Unigene89595_All | Unigene62705_All     | uncharacterized protein                       |
| Unigene89595_All | Unigene6461_All      | transmembrane emp24 domain-containing protein |
| Unigene89595_All | Unigene65925_All     | protein phosphatase 1G                        |
| Unigene89595_All | Unigene6864_All      | predicted protein                             |
| Unigene89595_All | Unigene73569_All     | E3 ubiquitin-protein ligase MIB2-like isoform |
| Unigene89595_All | Unigene7884_All      | acyl-CoA-binding domain-containing protein    |
| Unigene89595_All | Unigene80640_All     | hypothetical protein                          |
| Unigene89595_All | Unigene85463_All     | dnaJ homolog subfamily C member               |
| Unigene89595_All | Unigene92314_All     | tubulin polyglutamylase TTL5-like isoform     |
| Unigene9030_All  | CL10956.Contig11_All | truncated actin-4                             |
| Unigene9030_All  | CL10956.Contig6_All  | muscle-specific actin-like                    |
| Unigene9030_All  | Unigene15826_All     | hypothetical protein                          |
| Unigene9030_All  | Unigene57912_All     | predicted protein                             |
